# Supplementary material
Source: PubMed Central journal article supplement (PMC365774)

**A**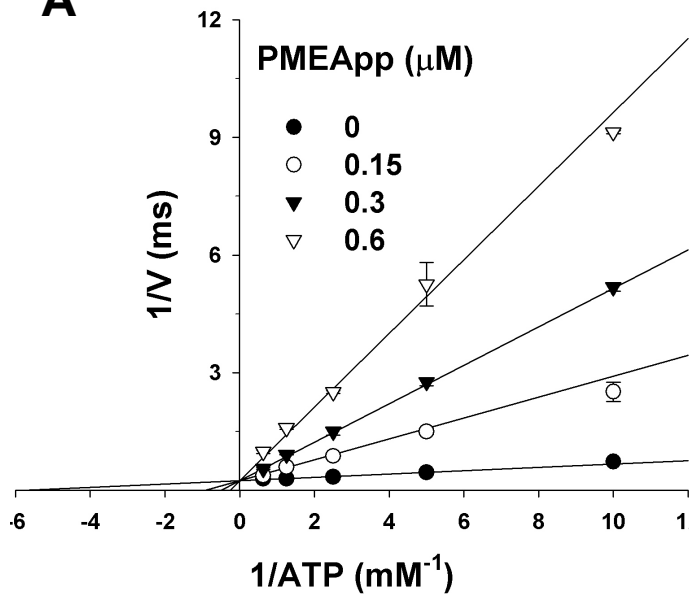**B**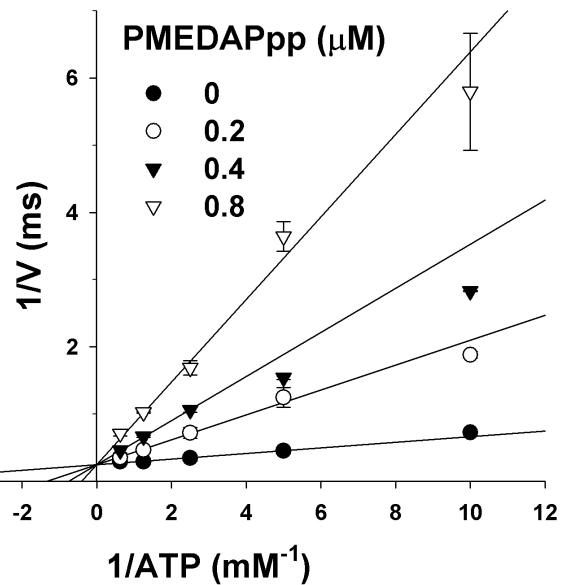**C**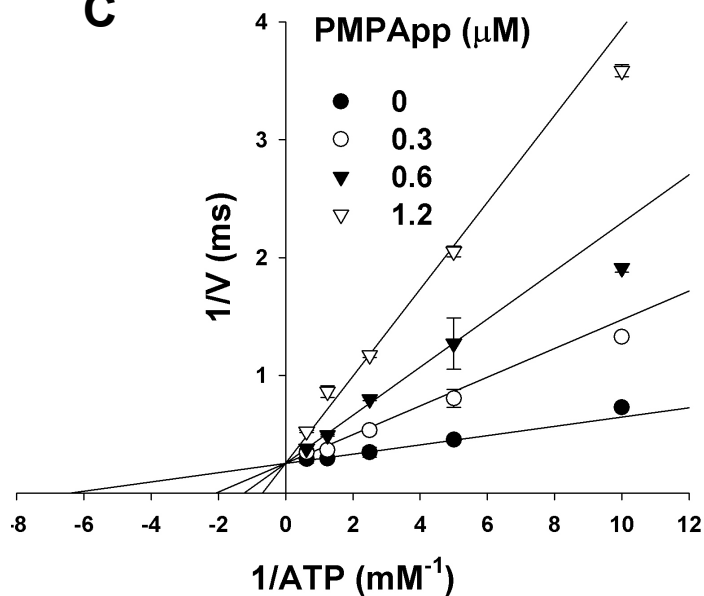**D**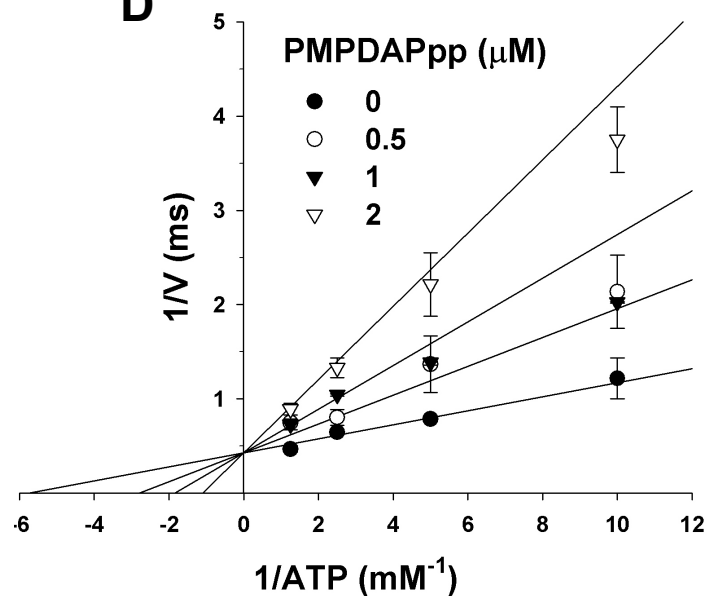

Supplement: pnas_101_9_3242__3.pdf [file pnas_101_9_3242__3.pdf]

**A**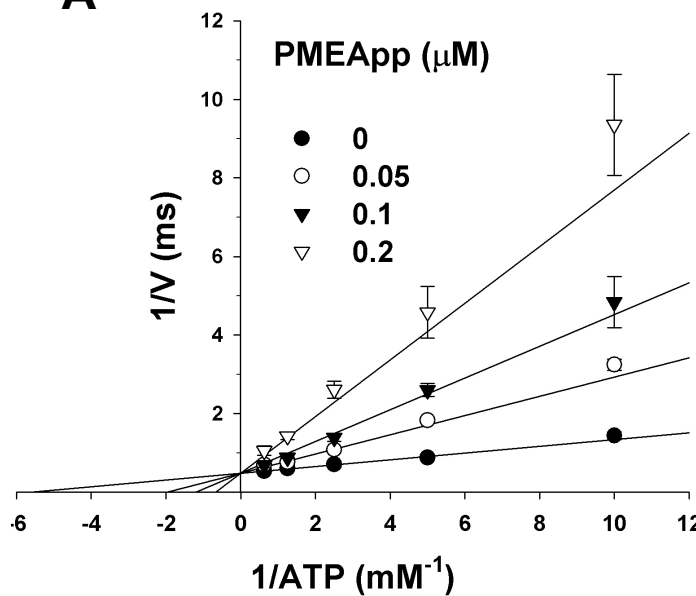**B**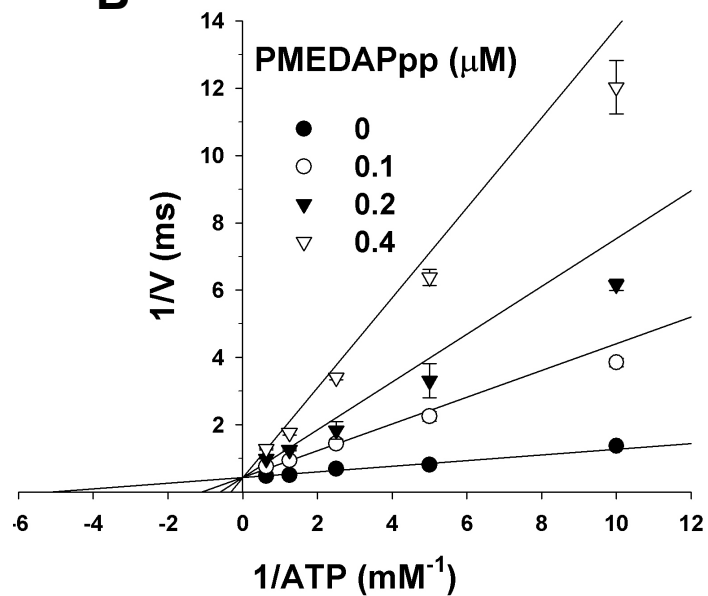**C**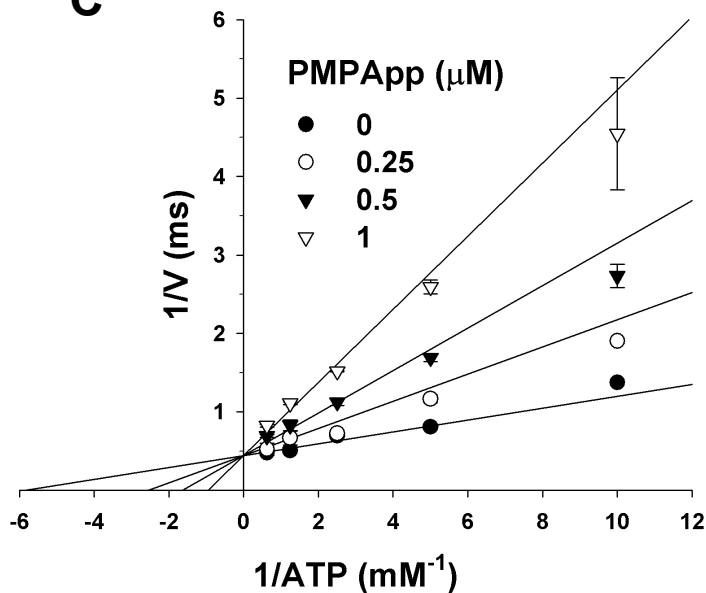**D**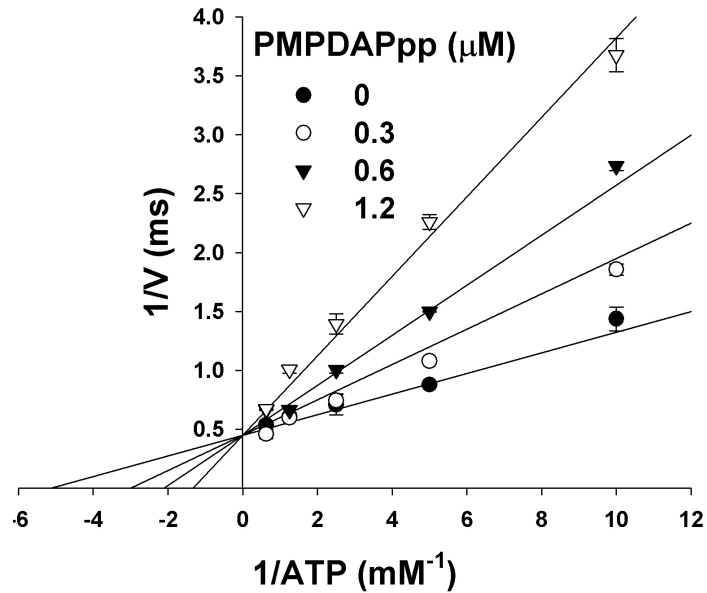

Supplement: pnas_101_9_3242__5.pdf [file pnas_101_9_3242__5.pdf]

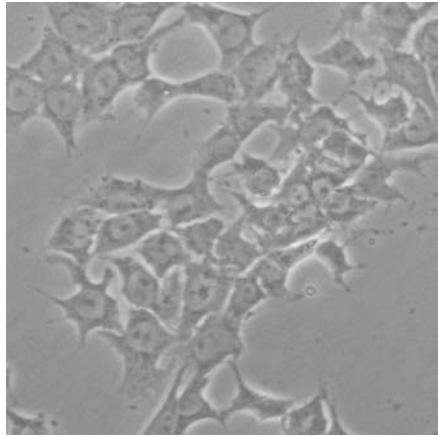

**Control**

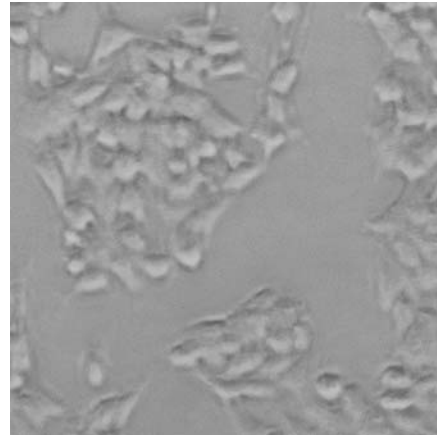

**PA+EF**

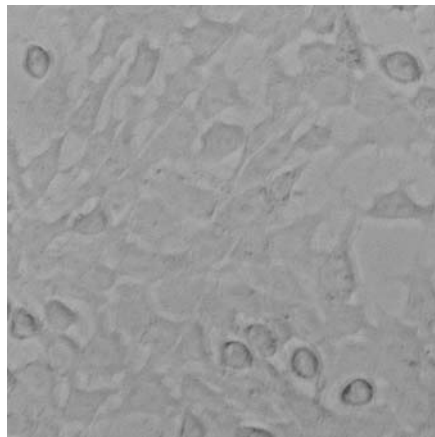

**PA+EF  
+1  $\mu$ M adefovir dipivoxil**

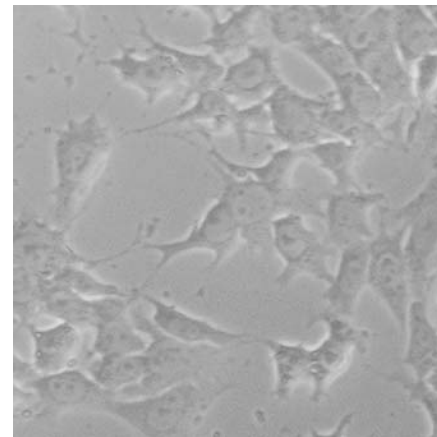

**PA+EF  
+10  $\mu$ M adefovir dipivoxil**

Supplement: pnas_101_9_3242__7.pdf [file pnas_101_9_3242__7.pdf]

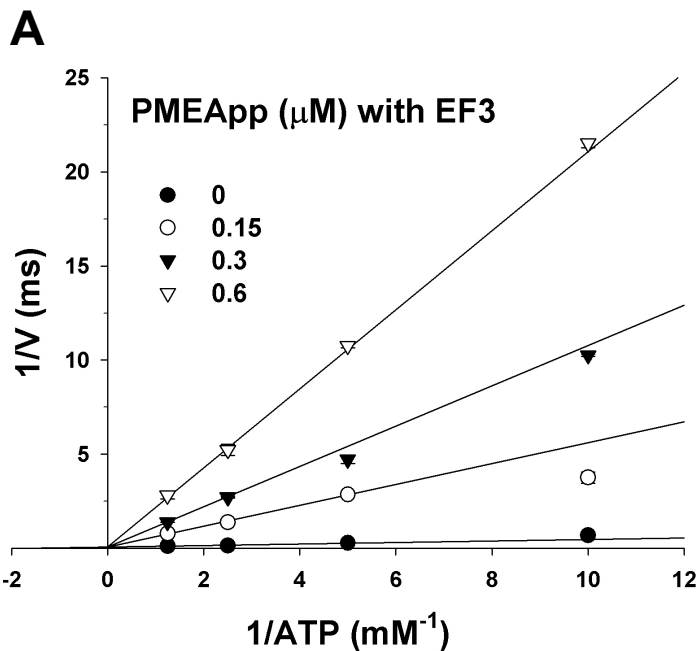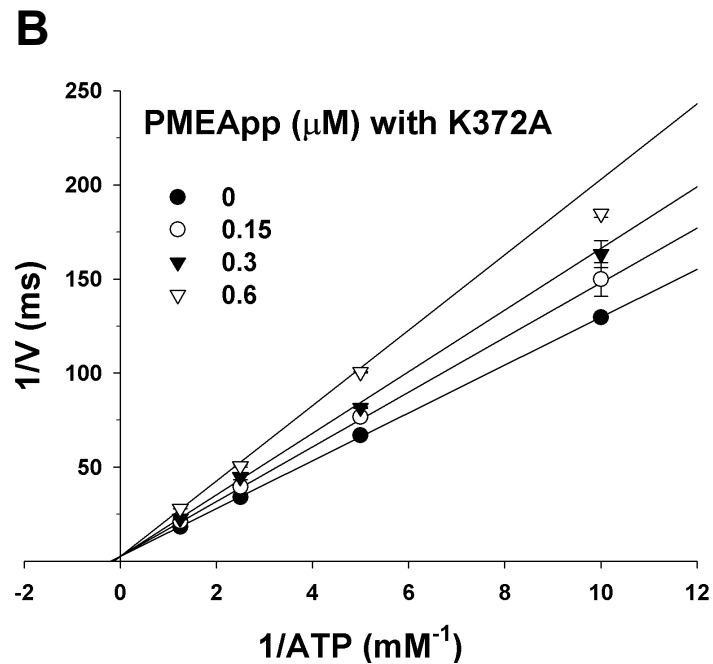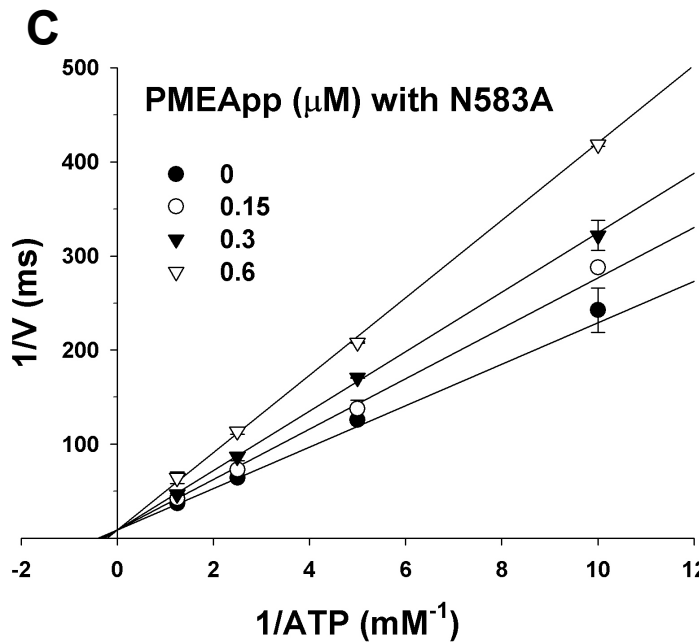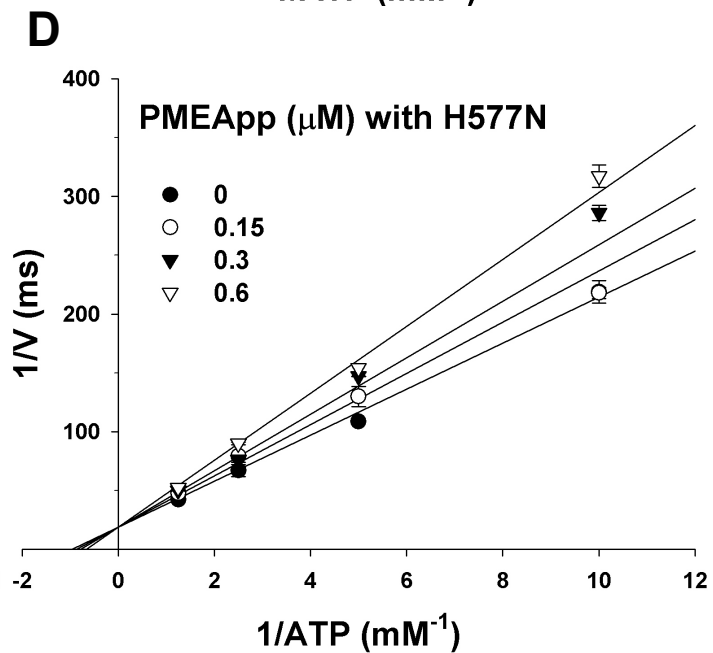

Supplement: pnas_101_9_3242__9.pdf [file pnas_101_9_3242__9.pdf]
